# Supplementary material for: The effect of Si/Al ratio on the catalytic performance of hierarchical porous ZSM-5 for catalyzing benzene alkylation with methanol
Source: Royal Society of Chemistry journal article supplement (doi:10.1039/c5cy01976a), 2016-01-01
Supplement: c5cy01976a1.pdf [file c5cy01976a1.pdf]

## Supporting Information

For

### **The effect of Si/Al ratio on the catalytic performance of hierarchical porous ZSM-5 for catalyzing benzene alkylation with methanol**

Hualei Hu, Jinghui Lyu, Jiayao Rui, Jie Cen, Qunfeng Zhang, Qingtao Wang,  
Wenwen Han, and Xiaonian Li\*

*Industrial Catalysis Institute of Zhejiang University of Technology, State Key  
Laboratory Breeding Base of Green Chemistry Synthesis Technology, Hangzhou,  
310032, P. R. China*

Corresponding author: E-mail: xnli@zjut.edu.cn. Fax: +86-571-88320667. Tel.: +86-571-88320002.

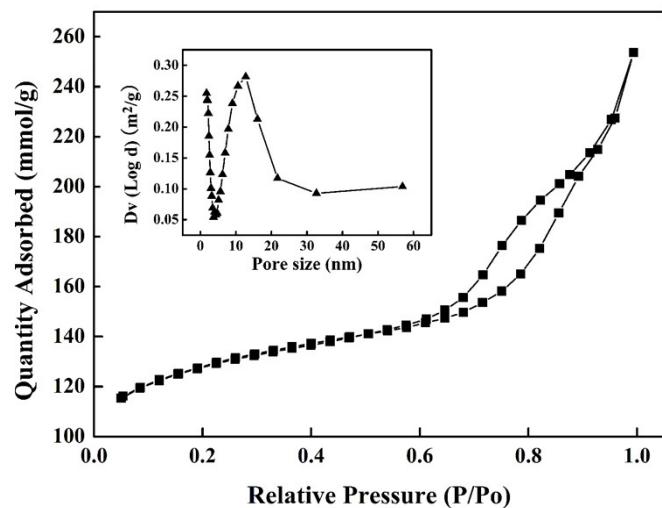

**Figure S1** Nitrogen adsorption-desorption isotherms and pore-size distribution of synthesized hierarchical porous ZSM-5 (Si/Al ratio 180)

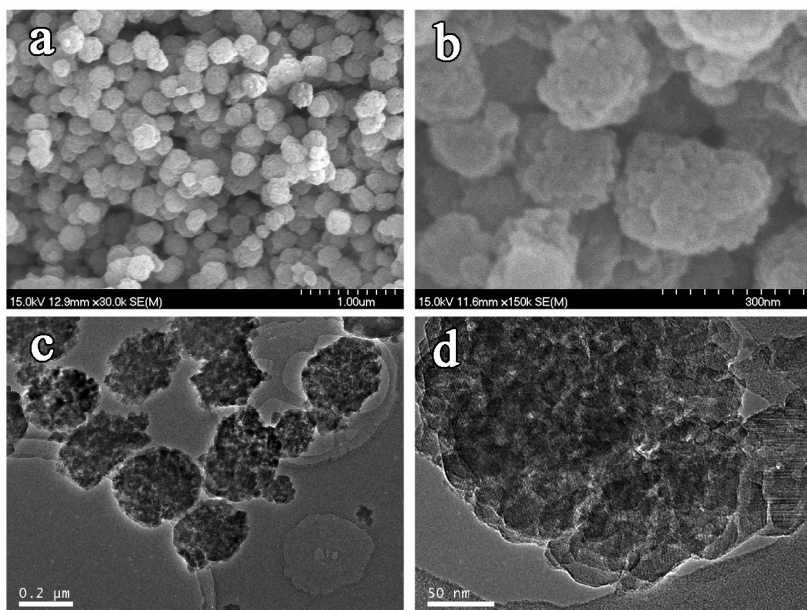

**Figure S2** SEM image (a, b) and TEM image (c, d) of synthesized hierarchical porous ZSM-5 (Si/Al ratio 180).

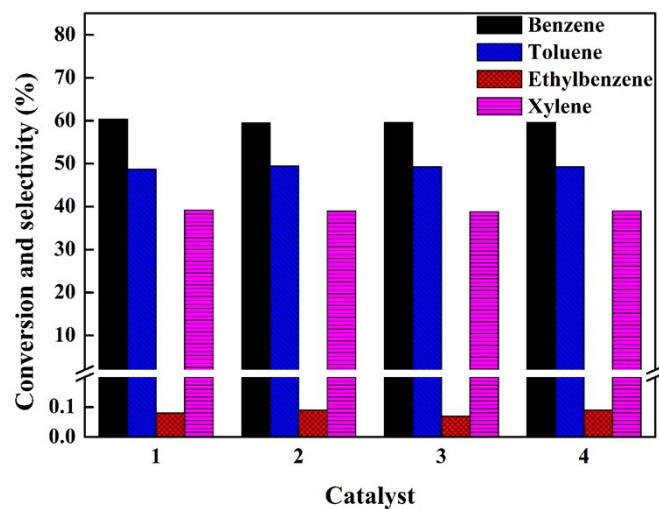

**Figure S3** Catalytic performance of synthesized hierarchical porous ZSM-5 (Si/Al 1800) in benzene alkylation with methanol. (1, evaluation of first synthesized sample; 2, evaluation of first synthesized sample again; 3, evaluation of second synthesized sample; 4, evaluation of third synthesized sample)

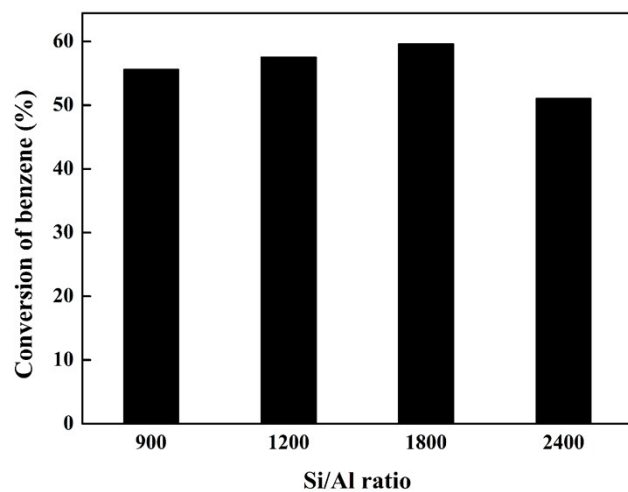

**Figure S4** Catalytic performances of synthesized hierarchical porous ZSM-5 (with Si/Al ratio 900, 1200, 1800 and 2400) in benzene alkylation with methanol.
